# Supplementary material
Source: publisher figshare collection journal article supplement (https://frontiersin.figshare.com/ndownloader/files/25527479)
Supplement: Supplementary file 1 [file 25527479]

## **Supplement 2: Categories of the Coding Manual**

1. Overarching goal of the project
2. Coding procedure
  - 2.1 Unit of analysis: Excel output of browser history
    - A1: Proband's ID
    - A2: Processed task
    - A3: Number of sources used
      - A3.1: Total number of sources (URLs excluding subsites; excluding Google)
      - A3.2: Number of visited subsites
      - A3.3: Proband exclusively visiting the given website of the task (no external sources)
    - A4: Number of Google/Bing search queries
  - 2.2: Unit of analysis: Websites
    - B1: Proband's ID
    - B2: Website number
    - B3: URL of respective website
    - B4: Number of respective task
    - B5: Originator of the website
    - B6: Content-related quality dimensions
      - B6.1: Extent
        - B6.2.1: Scientific sources in the text
        - B6.2.2: Non-scientific sources in the text
      - B6.3: Diversity of opinion
        - B6.3.1: One-sidedness vs. Versatility
        - B6.3.2: Selling or advertising intentions I (selling intentions in the text)
        - B6.3.3: Selling or advertising intentions II (advertisements related to the topic of the task)
      - B6.4: Factuality
      - B6.5: Dominance of respective topic of the task
      - B6.6: Decorative or textually meaningful pictures
      - B6.7: Infographic
      - B6.8: Info video
      - B.6.9: Fee required access to website
      - B.6.10: Subsite not accessible
      - B.6.11: Credibility of information sources

| <b>B5 Originator of the website</b>                                                   |  |
|---------------------------------------------------------------------------------------|--|
| <b>1) Website Given in the Task</b>                                                   |  |
| <b>2) Social Media</b>                                                                |  |
| 21 Facebook                                                                           |  |
| 22 Wikipedia                                                                          |  |
| 23 Blog                                                                               |  |
| 24 Twitter                                                                            |  |
| 25 YouTube                                                                            |  |
| 26 Instagram                                                                          |  |
| 27 Online Forums                                                                      |  |
| 28 Other                                                                              |  |
| <b>3) Research Institute</b>                                                          |  |
| 31 affiliated to a scientific institution                                             |  |
| 32 without scientific affiliation                                                     |  |
| <b>4) Governmental Institution</b>                                                    |  |
| <b>5) News Site</b>                                                                   |  |
| 51 public news sites                                                                  |  |
| 52 established sites of a quality newspaper                                           |  |
| 53 established sites of a tabloid newspaper                                           |  |
| 54 news sites not affiliated to any journalistic offline-product (untrustworthy news) |  |
| 55 news sites not affiliated to any journalistic offline-product (trustworthy news)   |  |
| 56 local news sites                                                                   |  |
| 57 alternative news sites                                                             |  |
| <b>7) Websites of Professional Journals</b>                                           |  |
| <b>8) Scientific Publications / Online Catalogs</b>                                   |  |
| 71 Sites of scientific journals                                                       |  |
| 72 online catalogs of universities                                                    |  |
| 73 Google Scholar                                                                     |  |
| <b>8) Book Uploads</b>                                                                |  |
| 81 Book as PDF                                                                        |  |
| 82 Google Books                                                                       |  |
| <b>9) Online Shop</b>                                                                 |  |
| <b>10) Organization = Club/Association</b>                                            |  |
| <b>99 Other</b>                                                                       |  |
